# Supplementary material for: Assembly of silver alkynyl compounds with various nuclearities
Source: Royal Society of Chemistry journal article supplement (doi:10.1039/c4dt03394a), 2014-12-17

## Supporting Information

### Assembly of Silver Alkynyl Compounds with Various Nuclearities

Yu-Mei Lin\*, Zong-Jie Guan, Kuan-Guan Liu, Zhan-Guo Jiang and Quan-Ming Wang\*

X-ray powder diffractometry studies were performed on a Panalytical X-Pert pro diffractometer with Cu K $\alpha$  radiation.

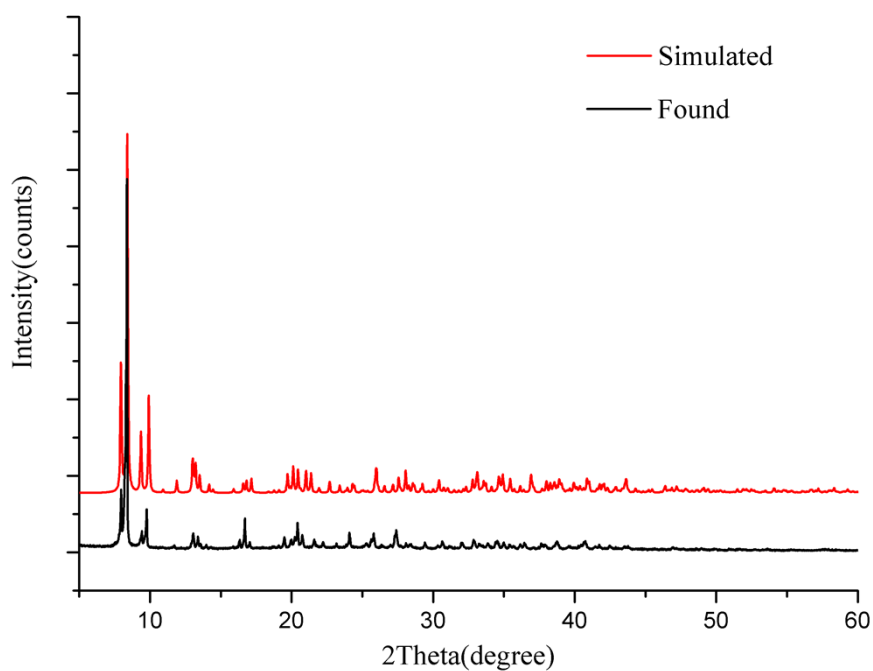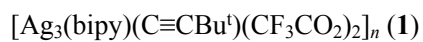

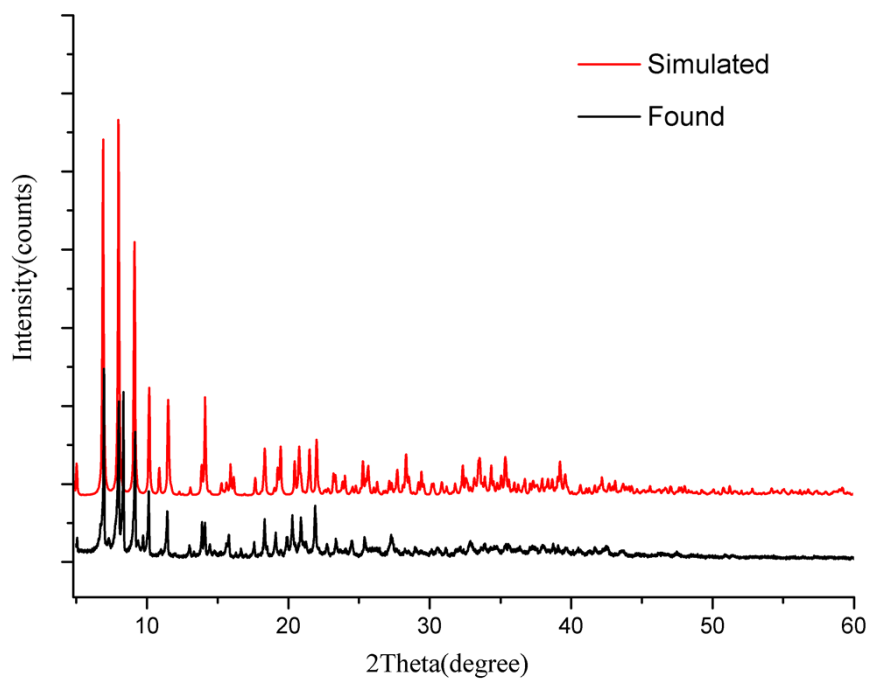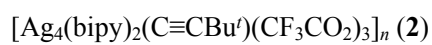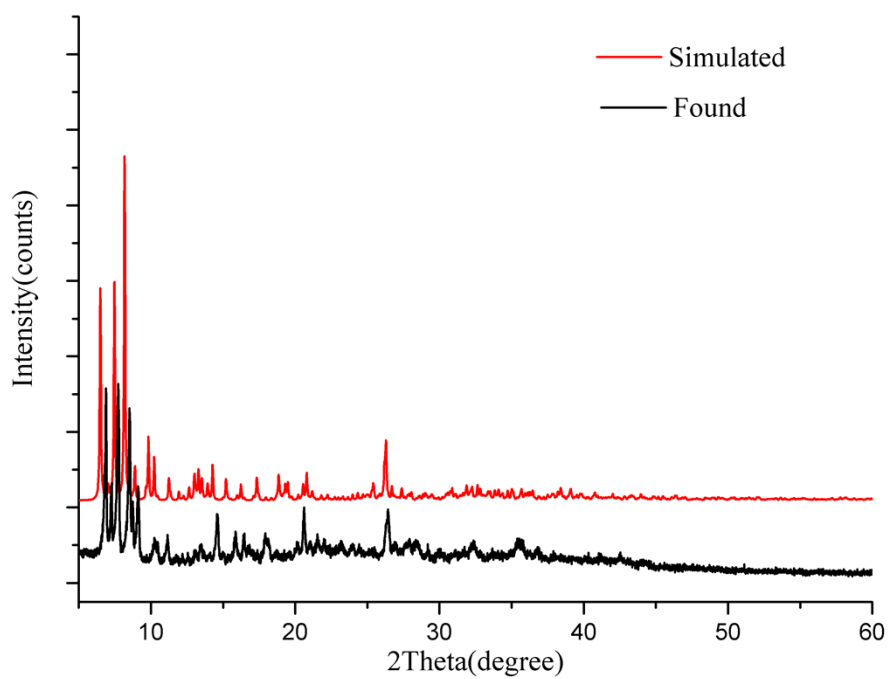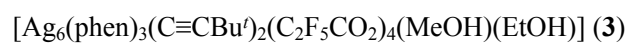

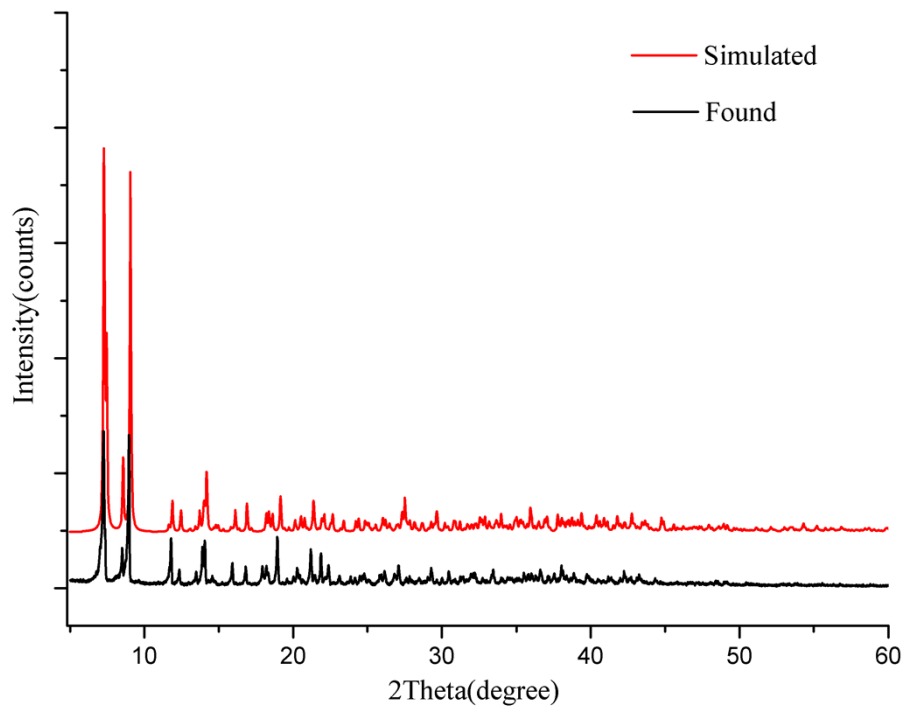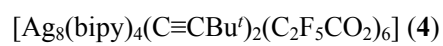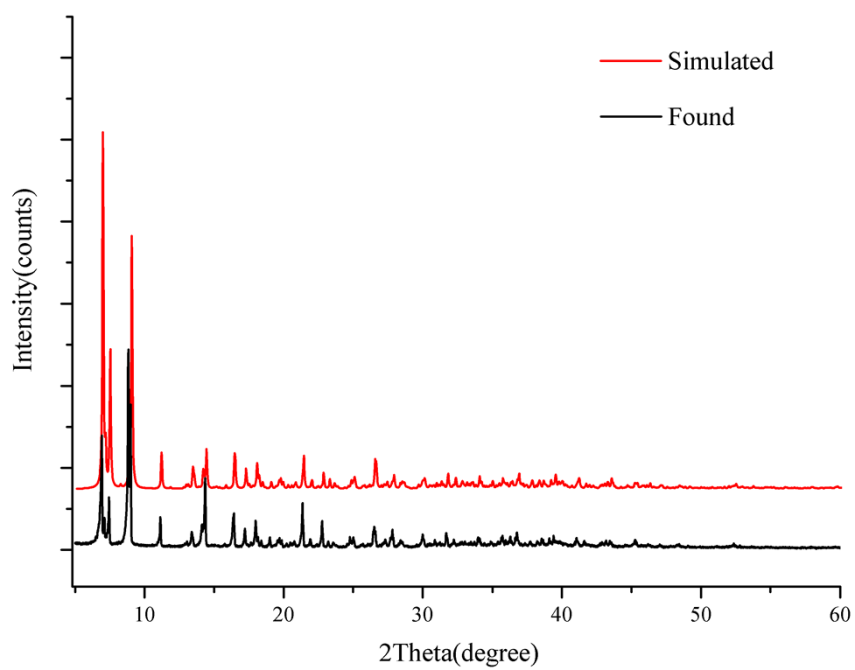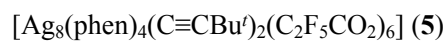

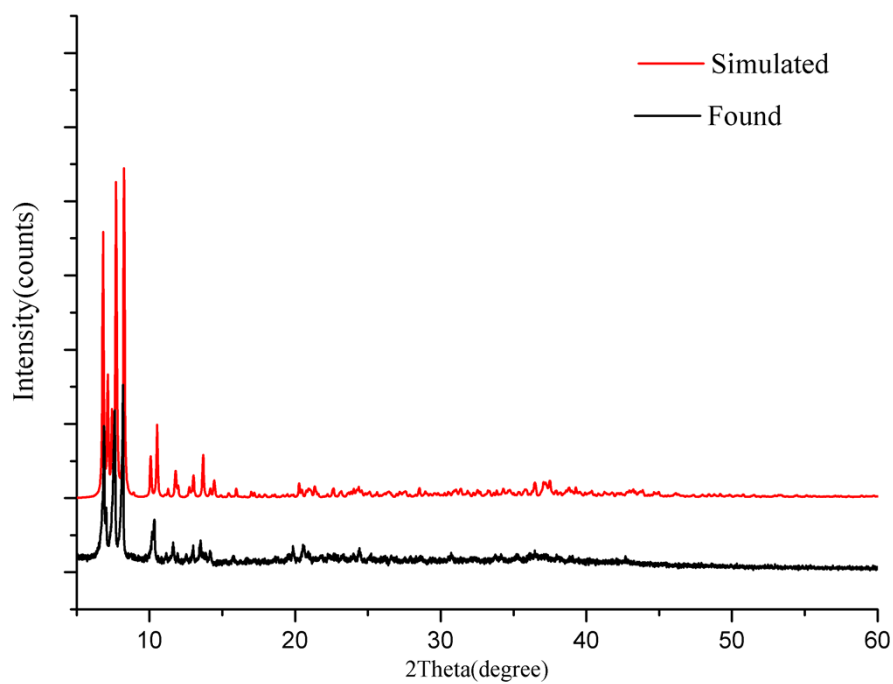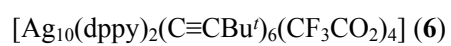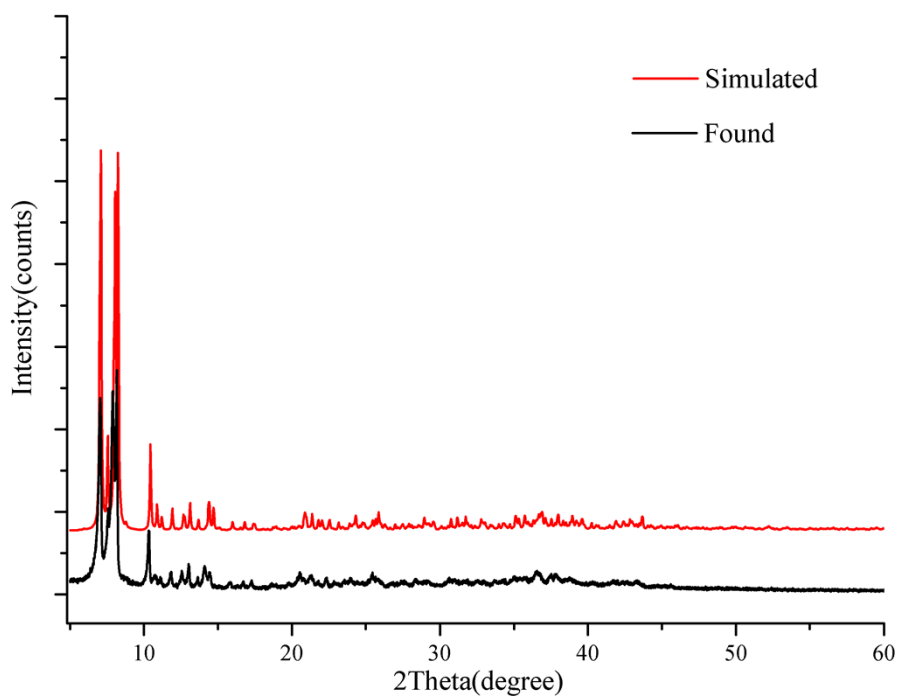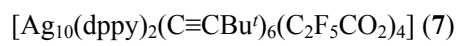

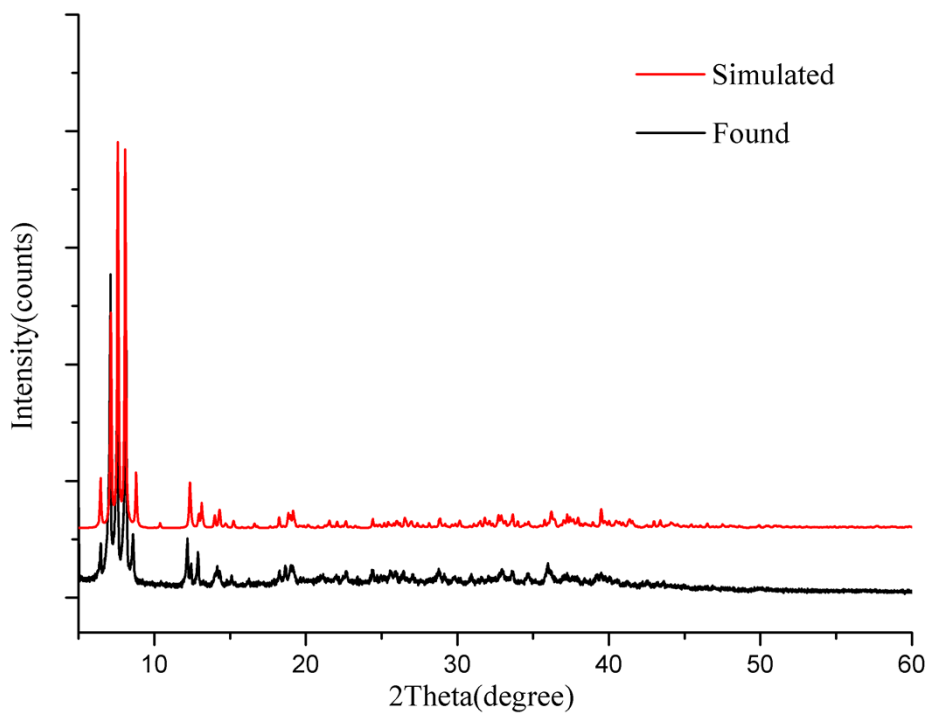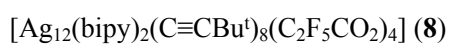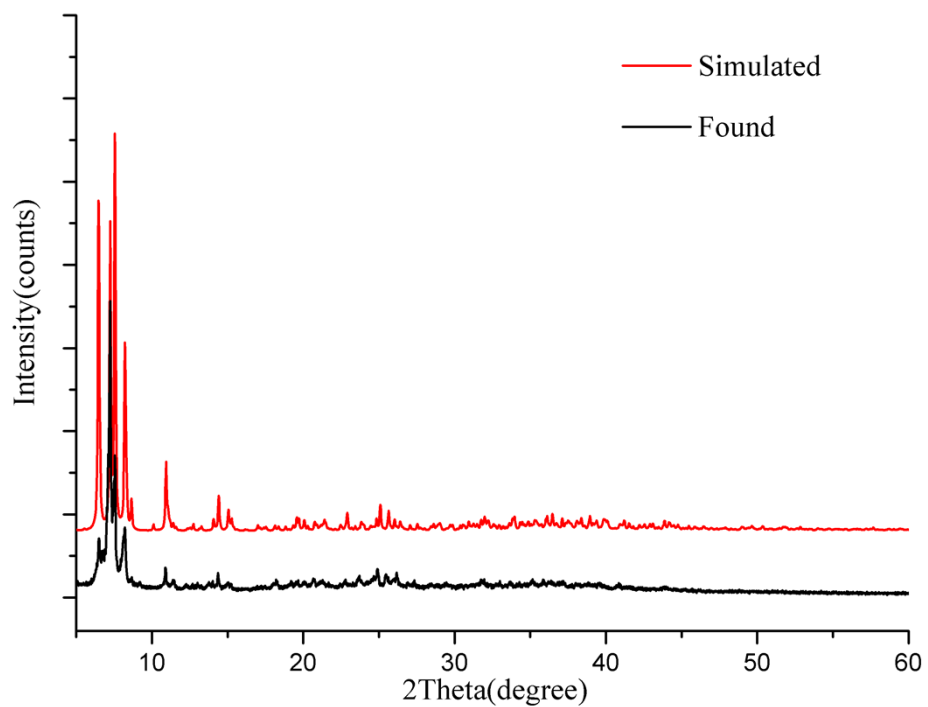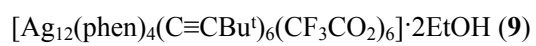

Supplement: c4dt03394a1.pdf [file c4dt03394a1.pdf]
